# Supplementary material for: Negotiating virtually and face-to-face: First experience from a serious game conducted in person and via smartphone application
Source: Research Square preprint supplement (doi:10.21203/rs.3.rs-6110762/v1), 2025-03-20
Supplement: Supplementary file 1 [file 0ebf6a5b821aa4fda514f9db.docx]

**Table 1.** Self-reported data of the participants from the pre-and post-game surveys.

|  | **Virtual *P-Game***  **Hungary** (n=29, this study) | **Face-to-face *P-Game***  **Hungary** (n=30) | **Face-to-face *P-Game***  **Globally** (n=788) |
| --- | --- | --- | --- |
| *Background of the participants* | | | |
| Educational  background | 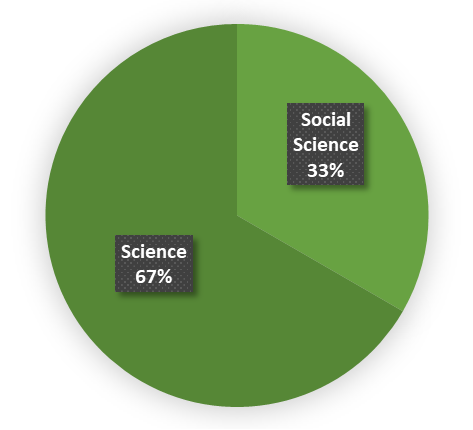 | 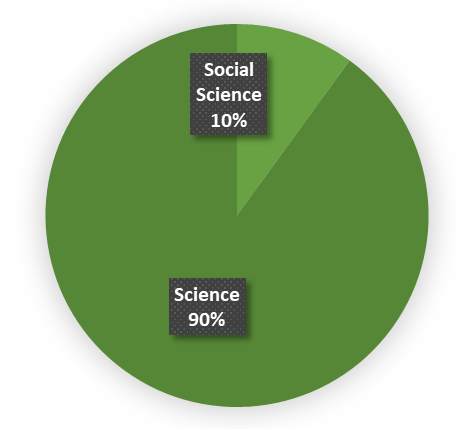 | 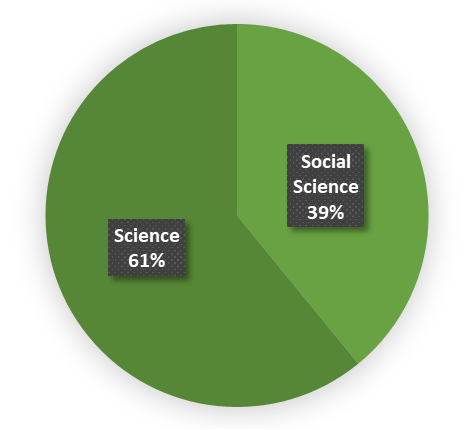 |
| Level of education | 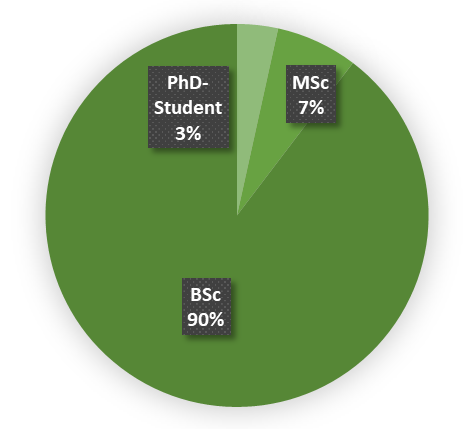 | 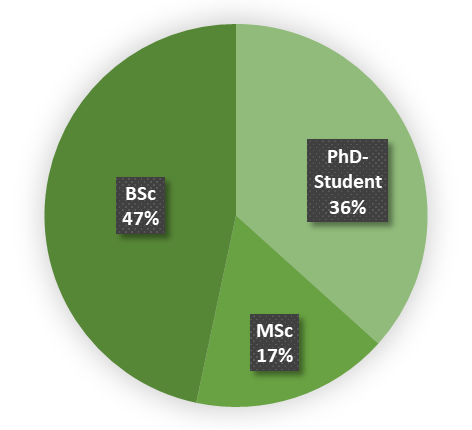 | 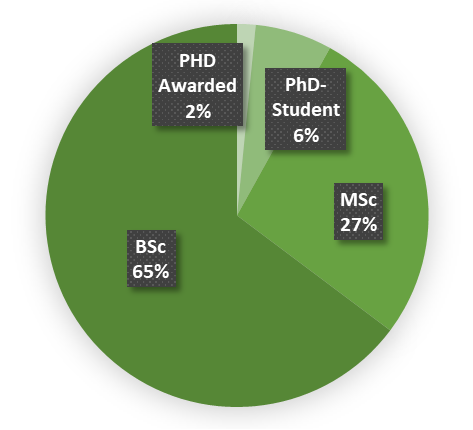 |
| Gender | 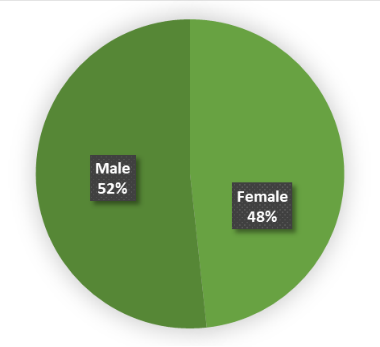 | 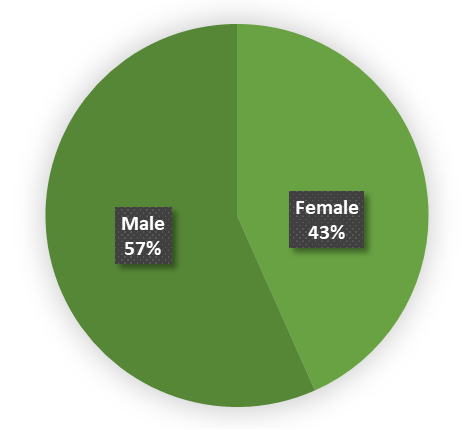 | 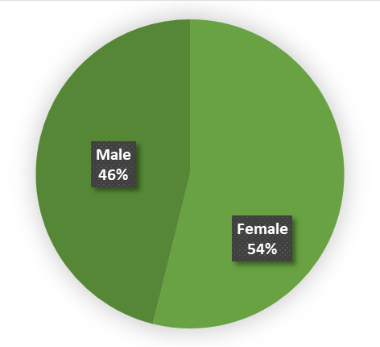 |
| Age | 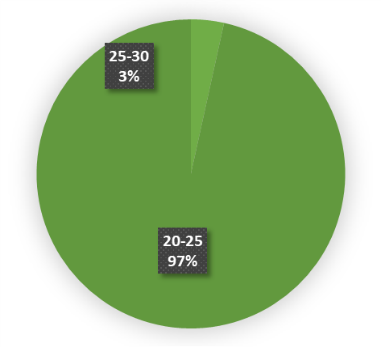 | 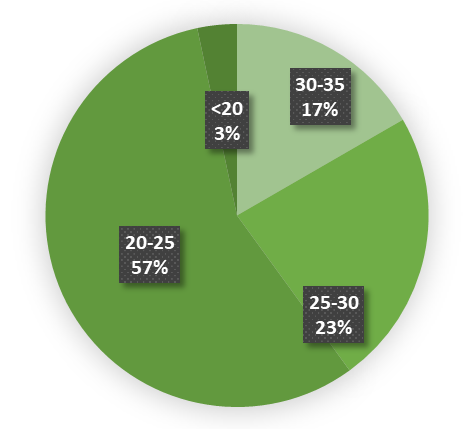 | 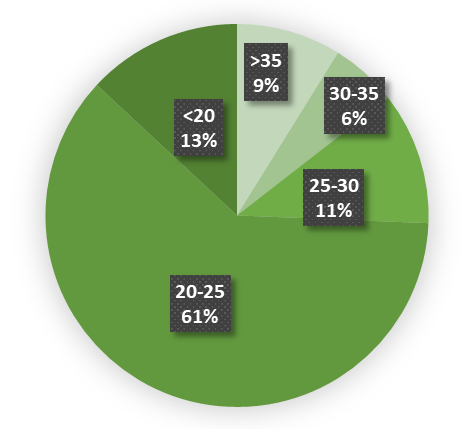 |
| *Self-reported knowledge on phosphorus science* | | | |
| Pre-Game | 1.72±1.36 | 1.50±0.86 | 1.56±0.98 |
| Post-Game | 3.24±1.61 | 2.56±0.94 | 3.00±1.04 |
| %Change1 | +88.4±82.5 % | +70.7±48.1 % | +92.3±66.2 % |
| Hedges’ G | 1.02 | 1.16 | 1.43 |
| *Self-reported knowledge on negotiation science/practice* | | | |
| Pre-Game | 2.34±1.39 | 1.97±1.07 | 1.83±1.03 |
| Post-Game | 3.64±1.38 | 3.03±0.96 | 3.12±1.02 |
| %Change1 | +55.6±39.1 % | +53.81±33.83 % | +70.5±45.9 % |
| Hedges’ G | 0.94 | 1.04 | 1.26 |

The SD of the % Change was calculated applying the principles of uncertainty propagation [33].
